# Supplementary material for: Differences in the transcriptome of medullary thyroid cancer regarding the status and type of RET gene mutations
Source: PubMed Central journal article supplement (PMC5299608; doi:10.1038/srep42074), 2017-02-09
Supplement: srep42074-s1.pdf [file srep42074-s1.pdf]

## **Differences in the transcriptome of medullary thyroid cancer regarding the status and type of *RET* gene mutations**

Malgorzata Oczko-Wojciechowska<sup>1\*^</sup>, Michal Swierniak<sup>1,2^</sup>, Jolanta Krajewska<sup>1^</sup>, Malgorzata Kowalska<sup>1</sup>, Monika Kowal<sup>1</sup>, Tomasz Stokowy<sup>3</sup>, Bartosz Wojtaś<sup>1</sup>, Dagmara Rusinek<sup>1</sup>, Agnieszka Pawlaczek<sup>1</sup>, Agnieszka Czarniecka<sup>4</sup>, Sylwia Szpak-Ulczok<sup>1</sup>, Tomasz Gawlik<sup>1</sup>, Ewa Chmielik<sup>5</sup>, Tomasz Tyszkiewicz<sup>1</sup>, Barbara Nikiel<sup>5</sup>, Dariusz Lange<sup>5</sup>, Michal Jarzab<sup>6</sup>, Malgorzata Wiench<sup>7</sup>, Barbara Jarzab<sup>1</sup>

<sup>^</sup> These three authors contributed equally to this study

<sup>1</sup> Department of Nuclear Medicine and Endocrine Oncology, Maria Sklodowska-Curie Memorial Cancer Center and Institute of Oncology, Gliwice Branch, Poland

<sup>2</sup> Genomic Medicine, Medical University of Warsaw, Poland

<sup>3</sup> Department of Clinical Science, University of Bergen, Norway

<sup>4</sup> The Oncology and Reconstructive Surgery Clinic, Maria Sklodowska-Curie Memorial Cancer Center and Institute of Oncology, Gliwice Branch, Poland

<sup>5</sup> Tumour Pathology Department, Maria Sklodowska-Curie Memorial Cancer Center and Institute of Oncology, Gliwice Branch, Poland

<sup>6</sup> III Radiotherapy Clinic, Maria Sklodowska-Curie Memorial Cancer Center and Institute of Oncology, Gliwice Branch, Poland

<sup>7</sup> College of Medical and Dental Sciences, University of Birmingham, United Kingdom

Supplementary Information

Supplementary Table 1. All samples used in analysis

| No | Sample code | MTC        | Gender | <i>RET</i> germline mutation | <i>RET</i> somatic mutation | Group hereditary vs sporadic | Group MEN2A vs MEN2B-like | Method of analysis | ETV6-NTRK3 analysisi | SET | ICH |
|----|-------------|------------|--------|------------------------------|-----------------------------|------------------------------|---------------------------|--------------------|----------------------|-----|-----|
| 1  | MTC 34      | hereditary | F      | p.V804L GTG/TTG              | NA                          | hereditary                   |                           | Human Gene 1.0 ST  | NA                   | A   | NA  |
| 2  | MTC 57      | hereditary | F      | p.G768D GAG/GAT              | NA                          | hereditary                   |                           | Human Gene 1.0 ST  | NA                   | A   | NA  |
| 3  | MTC 20      | sporadic   | F      | 0                            | 0                           | sporadic                     |                           | Human Gene 1.0 ST  | NA                   | A   | NA  |
| 4  | MTC 22      | sporadic   | F      | 0                            | 0                           | sporadic                     |                           | Human Gene 1.0 ST  | NA                   | A   | NA  |
| 5  | MTC 10      | sporadic   | M      | 0                            | NA                          | sporadic                     |                           | Human Gene 1.0 ST  | NA                   | A   | NA  |
| 6  | MTC 100     | sporadic   | M      | 0                            | del (7 bp) exon 11          | sporadic                     |                           | Human Gene 1.0 ST  | NA                   | A   | NA  |
| 7  | MTC 110     | sporadic   | F      | 0                            | p.M918T ATG/ACG             | sporadic                     |                           | Human Gene 1.0 ST  | NA                   | A   | NA  |
| 8  | MTC 111     | sporadic   | F      | 0                            | 0                           | sporadic                     |                           | Human Gene 1.0 ST  | NA                   | A   | NA  |
| 9  | MTC 118     | sporadic   | F      | 0                            | 0                           | sporadic                     |                           | Human Gene 1.0 ST  | NA                   | A   | NA  |
| 10 | MTC 119     | sporadic   | M      | 0                            | 0                           | sporadic                     |                           | Human Gene 1.0 ST  | NA                   | A   | NA  |
| 11 | MTC 122     | sporadic   | F      | 0                            | 0                           | sporadic                     |                           | Human Gene 1.0 ST  | NA                   | A   | NA  |
| 12 | MTC 123     | sporadic   | M      | 0                            | del/ins exon 11             | sporadic                     |                           | Human Gene 1.0 ST  | NA                   | A   | NA  |
| 13 | MTC 124     | sporadic   | F      | 0                            | 0                           | sporadic                     |                           | Human Gene 1.0 ST  | NA                   | A   | NA  |
| 14 | MTC 128     | sporadic   | F      | 0                            | 0                           | sporadic                     |                           | Human Gene 1.0 ST  | NA                   | A   | NA  |
| 15 | MTC 132     | sporadic   | F      | 0                            | 0                           | sporadic                     |                           | Human Gene 1.0 ST  | ND                   | A   | NA  |
| 16 | MTC 133     | sporadic   | F      | 0                            | 0                           | sporadic                     |                           | Human Gene 1.0 ST  | NA                   | A   | NA  |

|    |         |            |   |                 |                     |            |            |                   |    |      |    |
|----|---------|------------|---|-----------------|---------------------|------------|------------|-------------------|----|------|----|
| 17 | MTC 136 | sporadic   | F | 0               | 0                   | sporadic   |            | Human Gene 1.0 ST | NA | A    | NA |
| 18 | MTC 14  | sporadic   | F | 0               | del (6 bp) exon 11  | sporadic   |            | Human Gene 1.0 ST | NA | A    | NA |
| 19 | MTC 140 | sporadic   | F | 0               | 0                   | sporadic   |            | Human Gene 1.0 ST | NA | A    | NA |
| 20 | MTC 143 | sporadic   | F | 0               | 0                   | sporadic   |            | Human Gene 1.0 ST | NA | A    | NA |
| 21 | MTC 4   | sporadic   | M | 0               | NA                  | sporadic   |            | Human Gene 1.0 ST | NA | A    | NA |
| 22 | MTC 89  | sporadic   | F | 0               | p.A883F GCT/TTT     | sporadic   |            | Human Gene 1.0 ST | NA | A    | NA |
| 23 | MTC 24  | sporadic   | M | 0               | p.H568N CAC/AAC     | sporadic   |            | Human Gene 1.0 ST | NA | A    | NA |
| 24 | MTC 73  | sporadic   | F | 0               | del (19 bp) exon 11 | sporadic   |            | Human Gene 1.0 ST | NA | A    | NA |
| 25 | MTC 87  | sporadic   | F | 0               | 0                   | sporadic   |            | Human Gene 1.0 ST | NA | A    | NA |
| 26 | NIS 622 | sporadic   | F | 0               | 0                   | sporadic   |            | Human Gene 1.0 ST | NA | A    | NA |
| 27 | NIS 638 | sporadic   | F | 0               | NA                  | sporadic   |            | Human Gene 1.0 ST | NA | A    | NA |
| 28 | NIS 683 | sporadic   | F | 0               | NA                  | sporadic   |            | Human Gene 1.0 ST | NA | A    | NA |
| 29 | MTC 104 | hereditary | F | p.L790F TAT/TTT | NA                  | hereditary |            | Human Gene 1.0 ST | NA | A    | NA |
| 30 | MTC 154 | hereditary | M | p.L790F TTG/TTT | NA                  | hereditary |            | Human Gene 1.0 ST | NA | A    | NA |
| 31 | MTC 155 | hereditary | M | p.C634G TGC/GGC | NA                  | hereditary | MEN2A-like | Human Gene 1.0 ST | NA | A, B | NA |
| 32 | MTC 16  | hereditary | M | p.C620Y TGC/TAC | NA                  | hereditary | MEN2A-like | Human Gene 1.0 ST | NA | A, B | NA |
| 33 | MTC 32  | hereditary | F | p.C618W TGC/TGG | NA                  | hereditary | MEN2A-like | Human Gene 1.0 ST | NA | A, B | E  |
| 34 | MTC 38  | hereditary | F | p.C634W TGC/TGG | NA                  | hereditary | MEN2A-like | Human Gene 1.0 ST | NA | A, B | NA |
| 35 | MTC 63  | hereditary | M | p.C620Y TGC/TAC | NA                  | hereditary | MEN2A-like | Human Gene 1.0 ST | NA | A, B | NA |
| 36 | MTC 75  | hereditary | F | p.C618W TGC/TGG | NA                  | hereditary | MEN2A-like | Human Gene 1.0 ST | NA | A, B | NA |
| 37 | MTC 82  | hereditary | F | p.C618S TGC/AGC | NA                  | hereditary | MEN2A-like | Human Gene 1.0 ST | NA | A, B | NA |

|    |         |            |   |                 |                 |            |            |                   |    |         |    |
|----|---------|------------|---|-----------------|-----------------|------------|------------|-------------------|----|---------|----|
| 38 | NIS 258 | hereditary | F | p.C634G TGC/GGC | NA              | hereditary | MEN2A-like | Human Gene 1.0 ST | NA | A, B    | E  |
| 39 | NIS 262 | hereditary | F | p.C634G TGC/GGC | NA              | hereditary | MEN2A-like | Human Gene 1.0 ST | NA | A, B    | NA |
| 40 | NIS 634 | hereditary | F | p.C634W TGC/TGG | NA              | hereditary | MEN2A-like | Human Gene 1.0 ST | NA | A, B    | NA |
| 41 | NIS 657 | hereditary | F | p.C620Y TGC/TAC | NA              | hereditary | MEN2A-like | Human Gene 1.0 ST | NA | A, B    | NA |
| 42 | NIS 659 | hereditary | F | p.C634W TGC/TGG | NA              | hereditary | MEN2A-like | Human Gene 1.0 ST | NA | A, B    | NA |
| 43 | NIS 661 | hereditary | F | p.M918T ATG/ACG | NA              | hereditary | MEN2B-like | Human Gene 1.0 ST | NA | A, B    | NA |
| 44 | MTC 137 | sporadic   | M | 0               | p.C630G TGC/GGC | sporadic   | MEN2A-like | Human Gene 1.0 ST | NA | A, B    | NA |
| 45 | MTC 40  | sporadic   | F | 0               | p.C634R TGC/CGC | sporadic   | MEN2A-like | Human Gene 1.0 ST | NA | A, B    | NA |
| 46 | MTC 45  | sporadic   | M | 0               | p.C630R TGC/CGC | sporadic   | MEN2A-like | Human Gene 1.0 ST | NA | A, B    | NA |
| 47 | MTC 54  | sporadic   | F | 0               | p.M918T ATG/ACG | sporadic   | MEN2B-like | Human Gene 1.0 ST | ND | A, B    | NA |
| 48 | MTC 65  | sporadic   | F | 0               | p.C634W TGC/TGG | sporadic   | MEN2A-like | Human Gene 1.0 ST | NA | A, B    | NA |
| 49 | MTC 85  | sporadic   | F | 0               | p.C634R TGC/CGC | sporadic   | MEN2A-like | Human Gene 1.0 ST | NA | A, B    | E  |
| 50 | MTC 55  | sporadic   | M | 0               | p.M918T ATG/ACG | sporadic   | MEN2B-like | Human Gene 1.0 ST | NA | A, B    | E  |
| 51 | MTC 109 | hereditary | F | p.C634G TGC/GGC | NA              | hereditary | MEN2A-like | Human Gene 1.0 ST | NA | A, B    | E  |
| 52 | MTC 12  | hereditary | M | p.C618W TGC/TGG | NA              | hereditary | MEN2A-like | Human Gene 1.0 ST | NA | A, B    | NA |
| 53 | MTC 153 | hereditary | F | p.M918T ATG/ACG | NA              | hereditary | MEN2B-like | Human Gene 1.0 ST | ND | A, B, D | E  |
| 54 | MTC 30  | hereditary | F | p.C634R TGC/CGC | NA              | hereditary | MEN2A-like | Human Gene 1.0 ST | NA | A, B, D | NA |
| 55 | MTC 8   | hereditary | F | p.C634W TGC/TGG | NA              | hereditary | MEN2A-like | Human Gene 1.0 ST | NA | A, B, D | NA |
| 56 | MTC 120 | sporadic   | F | 0               | p.M918T ATG/ACG | sporadic   | MEN2B-like | Human Gene 1.0 ST | ND | A, B, D | NA |
| 57 | MTC 36  | sporadic   | F | 0               | p.M918T ATG/ACG | sporadic   | MEN2B-like | Human Gene 1.0 ST | ND | A, B, D | E  |
| 58 | MTC 42  | sporadic   | F | 0               | p.M918T ATG/ACG | sporadic   | MEN2B-like | Human Gene 1.0 ST | ND | A, B, D | NA |

|    |         |            |   |                 |                 |            |            |                   |    |         |    |
|----|---------|------------|---|-----------------|-----------------|------------|------------|-------------------|----|---------|----|
| 59 | MTC 98  | sporadic   | F | 0               | p.M918T ATG/ACG | sporadic   | MEN2B-like | Human Gene 1.0 ST | ND | A, B, D | NA |
| 60 | MTC 91  | sporadic   | F | 0               | p.M918T ATG/ACG | sporadic   | MEN2B-like | Human Gene 1.0 ST | ND | A, B, D | E  |
| 61 | MTC 117 | sporadic   | F | 0               | p.C634R TGC/CGC | sporadic   | MEN2A-like | qRT-PCR           | ND | C       | NA |
| 62 | MTC 28  | sporadic   | M | 0               | p.C634R TGC/CGC | sporadic   | MEN2A-like | qRT-PCR           | ND | C       | NA |
| 63 | MTC 113 | sporadic   | M | 0               | p.M918T ATG/ACG | sporadic   | MEN2B-like | qRT-PCR           | ND | C       | NA |
| 64 | MTC 134 | sporadic   | M | 0               | p.M918T ATG/ACG | sporadic   | MEN2B-like | qRT-PCR           | ND | C       | NA |
| 65 | MTC 144 | sporadic   | M | 0               | p.M918T ATG/ACG | sporadic   | MEN2B-like | qRT-PCR           | ND | C       | NA |
| 66 | MTC 84  | sporadic   | F | 0               | p.M918T ATG/ACG | sporadic   | MEN2B-like | qRT-PCR           | ND | C       | NA |
| 67 | MTC 131 | sporadic   | F | 0               | p.C634R TGC/CGC | sporadic   | MEN2A-like | qRT-PCR           | ND | C       | NA |
| 68 | MTC 138 | sporadic   | F | 0               | p.C634R TGC/CGC | sporadic   | MEN2A-like | qRT-PCR           | ND | C       | NA |
| 69 | MTC 125 | sporadic   | M | 0               | p.M918T ATG/ACG | sporadic   | MEN2B-like | qRT-PCR           | ND | C       | NA |
| 70 | MTC 126 | sporadic   | F | 0               | p.M918T ATG/ACG | sporadic   | MEN2B-like | qRT-PCR           | ND | C       | NA |
| 71 | MTC 145 | sporadic   | M | 0               | p.M918T ATG/ACG | sporadic   | MEN2B-like | qRT-PCR           | ND | C       | NA |
| 72 | MTC 69  | sporadic   | M | 0               | p.M918T ATG/ACG | sporadic   | MEN2B-like | qRT-PCR           | ND | C       | NA |
| 73 | NIS 478 | hereditary | M | p.C620Y TGC/TAC | NA              | hereditary | MEN2A-like | qRT-PCR           | NA | C       | NA |
| 74 | NIS 276 | hereditary | F | p.C620A TGC/CGC | NA              | hereditary | MEN2A-like | qRT-PCR           | NA | C       | E  |
| 75 | NIS 303 | hereditary | F | p.C634R TGC/CGC | NA              | hereditary | MEN2A-like | qRT-PCR           | NA | C       | NA |
| 76 | NIS 388 | hereditary | M | p.C634G TGC/GGC | NA              | hereditary | MEN2A-like | qRT-PCR           | NA | C       | NA |
| 77 | MTC 6   | hereditary | F | p.C620Y TGC/TAC | NA              | hereditary | MEN2A-like | qRT-PCR           | ND | C       | E  |
| 78 | MTC 61  | hereditary | F | p.C634R TGC/CGC | NA              | hereditary | MEN2A-like | qRT-PCR           | ND | C       | NA |
| 79 | NIS 474 | hereditary | F | p.C634G TGC/GGC | NA              | hereditary | MEN2A-like | qRT-PCR           | NA | C       | NA |

|    |         |            |   |                 |                 |            |            |         |    |     |    |
|----|---------|------------|---|-----------------|-----------------|------------|------------|---------|----|-----|----|
| 80 | NIS 507 | hereditary | M | p.C634R TGC/CGC | NA              | hereditary | MEN2A-like | qRT-PCR | NA | C   | E  |
| 81 | NIS 630 | hereditary | F | p.C634G TGC/GGC | NA              | hereditary | MEN2A-like | qRT-PCR | NA | C   | NA |
| 82 | NIS 278 | hereditary | M | p.C620A TGC/GCG | NA              | hereditary | MEN2A-like | qRT-PCR | NA | C   | NA |
| 83 | MTC 59  | sporadic   | F | 0               | p.C634F TGC/TTC | sporadic   | MEN2A-like | qRT-PCR | NA | C,D | NA |
| 84 | MTC 142 | sporadic   | M | 0               | p.M918T ATG/ACG | sporadic   | MEN2B-like | qRT-PCR | ND | C,D | NA |
| 85 | MTC 156 | hereditary | F | p.C634R TGC/CGC | NA              | hereditary | MEN2A-like | qRT-PCR | ND | C,D | NA |
| 86 | NIS476  | hereditary | F | p.V804L GTG/TTG | NA              | hereditary | MEN2A-like | NA      | NA | D   | E  |

NA - not analyzed

ND - not detected

ICH - immunohistochemistry

Set A: Cancer Genetic Background Analysis; microarray analysis; Hereditary vs Sporadic MTC

Set B: Mutational Analysis; MEN2 like vs MEN2B like

Set C: Validation Set for QPCR Analysis

Set D: Validation Set, protein level (ICH)

Supplementary Table 2. Sequences of primers and numbers of probes used for RT-qPCR validation part of study

|          | Roche Universal Probe Library |                            |                           |
|----------|-------------------------------|----------------------------|---------------------------|
| Gene     | Probe                         | Forward Primer             | Reverse Primer            |
| APOA1BP  | 77                            | aaatggacatccctttccttg      | gaagctgaagccaaagatgg      |
| CDC14B   | 66                            | gggtgccattgcagtacatt       | agatcctgaccacgcaat        |
| FHOD3    | 27                            | aggccagggtggaaaggt         | aggccagggtggaaaggt        |
| HMGA2    | 38                            | gcgcctcagaagagaggac        | ctccccctgggtctcttagg      |
| HSD17B14 | 49                            | ccgcctggattgtgtgt          | ggtctcctcaggcctctgt       |
| KIAA1337 | 33                            | aagaatgtgcttgcaaacagg      | cttcaaaggagggtggac        |
| KLF12    | 2                             | gggactctgtgtgagggaaa       | tgttcttagagtcacattgatcctg |
| NALCN    | 17                            | acaacagcatgcaacctgag       | ttcctcctcgatccgaca        |
| NNAT     | 65                            | gtacatctccgcgtgctg         | cttctcgcaatgggctgt        |
| NTRK3    | 21                            | ccgtacgagagggtgacaat       | tgtccagttcagattggctct     |
| TCERG1L  | 83                            | tccccacgggtggtgtag         | gctggtcaccttaaggetgttat   |
| ZC3H12C  | 13                            | ttcaaatgccattgtaaaaactactc | tctgtggctgttcttatgctct    |
| ZNF 404  | 63                            | tcagcgatgttgccatagac       | gcttcagttgtgaaattaaagtcc  |
| ZNF 432  | 17                            | ggagttcacctgggaggagt       | aacatcacatcccgggtacaaa    |
| ZNF 658  | 85                            | gagcacaagggtcaaggaagc      | gcaacaaaaacaaaacctgat     |
|          | TaqMan gene expression assay  |                            |                           |
| HMGA2    | Hs00971725_m1                 |                            |                           |
| NTRK3    | Hs00176797_m1                 |                            |                           |
| PDGFRL   | HS00185122_m1                 |                            |                           |

Supplementary Fig. S1. Immunohistochemical staining of TrkC receptor in MEN2A-like (black coloured) and MEN2B-like (blue coloured) samples. All MEN2B-like samples were strongly positive for TrkC, while MEN2A-like were negative except for one tumour which exhibited strong TrkC staining (MTC59 sample)

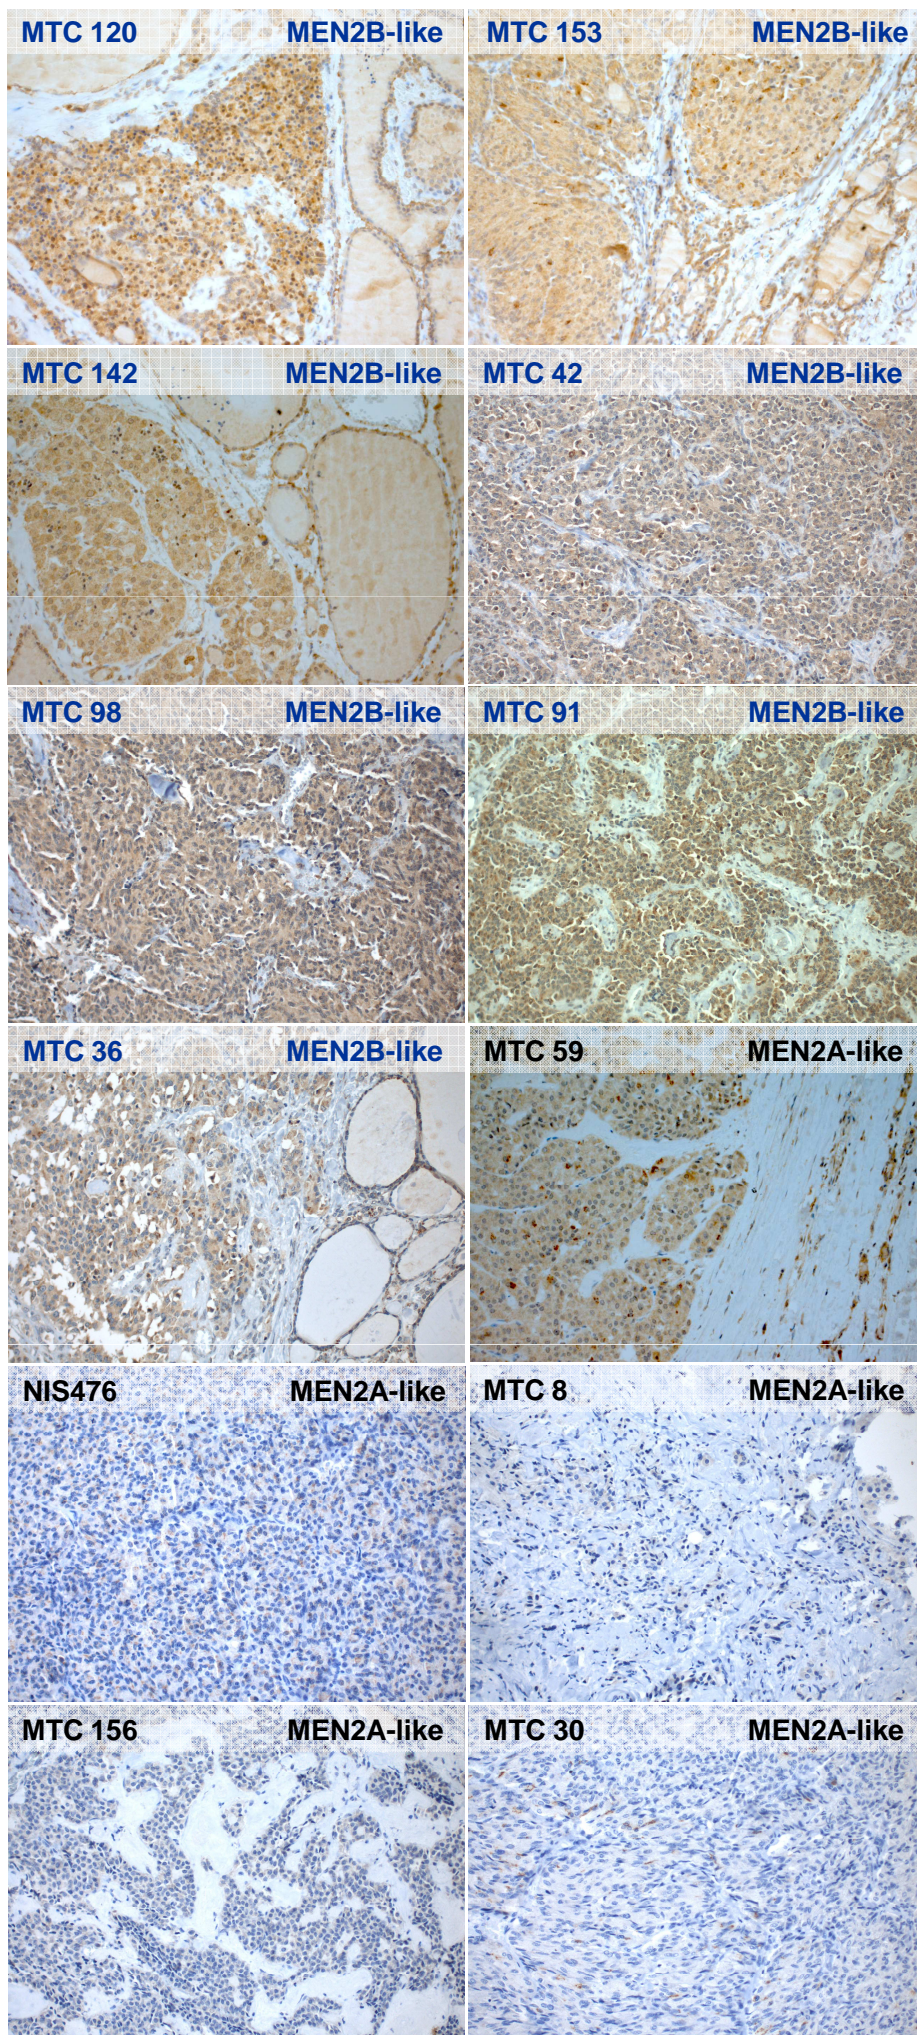



Supplementary Fig. S2. Result of analysis ETV-6-NTRK3 rearrangements. All 24 MTC samples were negative using PCR method.

006 028 036 042 044 054 061 069 084 091 098 113 117 120 125 126 M

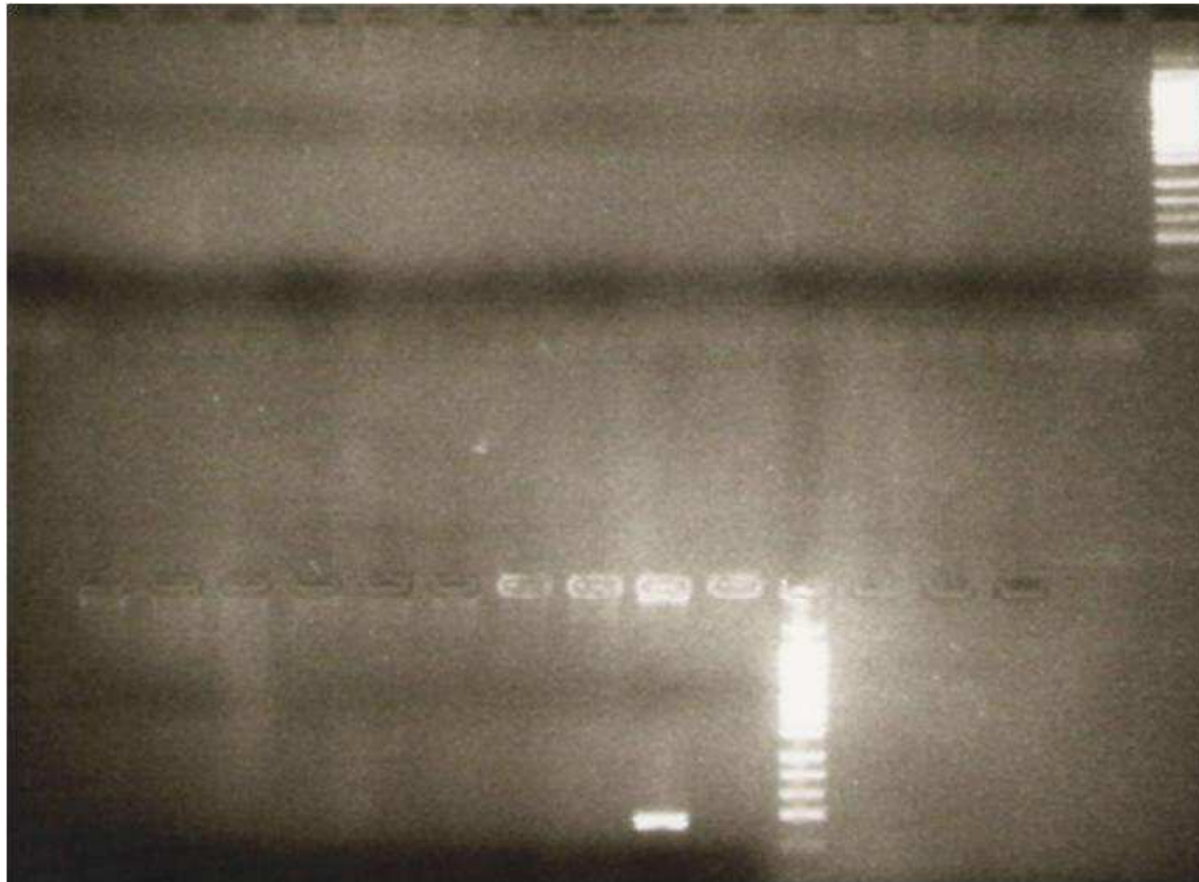

131 132 138 142 144 145 153 156 K+ K- M

K+ positive control  
K- negative control  
M – DNA size marker
